# Supplementary material for: Two Dimensional Oblique Molecular Packing within a Model Peptide Ribbon Aggregate
Source: PubMed Central journal article supplement — Chemphyschem. 2020 Jun 23;21(14):1519–23. doi: 10.1002/cphc.201901126 (PMC7496194; doi:10.1002/cphc.201901126), 2020-06-23
Supplement: CPHC-21-1519-s001.pdf [file CPHC-21-1519-s001.pdf]

# ChemPhysChem

Supporting Information

## **Two Dimensional Oblique Molecular Packing within a Model Peptide Ribbon Aggregate**

Stefan Kuczera,\* Axel Rüter, Kevin Roger, and Ulf Olsson

# 1 Supportive Information

## 1.1 Experimental Procedures DLS

Dynamic light scattering measurements were performed on an CGF-8F compact goniometer system from ALV GmbH, Langen, Germany. The laser intensity from a 22mW CW He-Ne gas laser with a wavelength  $\lambda = 632.8\text{nm}$  was automatically attenuated before each measurement. Two avalanche photodiode detectors were used in a pseudo-cross correlation arrangement and an ALV-7004 multiple tau digital correlator was used to create the time intensity correlation function. Data shown was acquired by a single 600s scan at an angle of  $90^\circ$ .

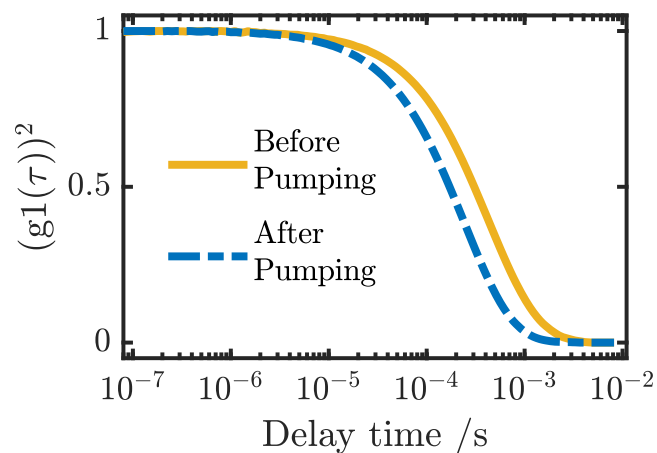

Figure 1: DLS measurement of the 5 wt% peptide solution before and directly after pumping. Samples were diluted 100 times before measured. The faster decay of the autocorrelation function from the pumped solution indicates that the aggregates are shorter after pumping

## 1.2 SAXS

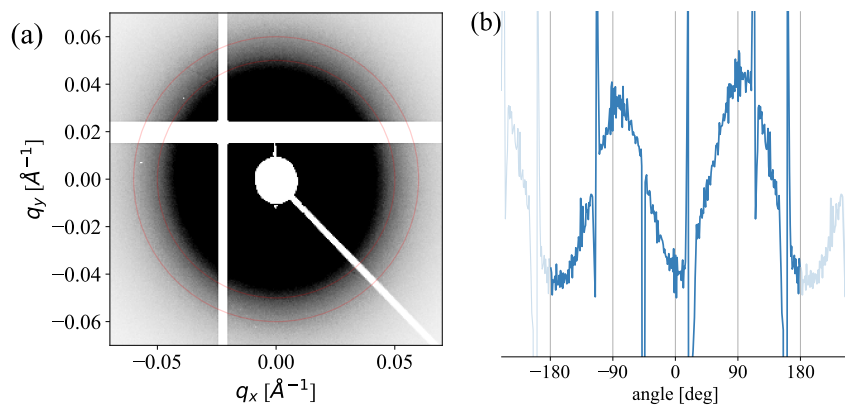

Figure 2: (a) 2D SAXS pattern for the 5 wt% peptide solution at a flow rate of 2.3 ml/min. (b) Angular intensity averaged over the region between the red circles in (a).
